# Supplementary material for: N-cadherin-regulated FGFR ubiquitination and degradation control mammalian neocortical projection neuron migration
Source: eLife. 2019 Oct 2;8:e47673. doi: 10.7554/eLife.47673 (PMC6786859; doi:10.7554/eLife.47673)
Supplement: Figure 1—source data 1. — (a,b) shRNA against FGFR1, 2 or three and Dominant-negative (DN) but not wildtype FGFR1, 2 or 3 induce an accumulation of neurons at the MMZ. a pNeuroD-FGFR(DN) and pNeuroD-FGFR plasmids, expressed in neurons, and b shRNA against FGFR1, 2 or 3 or negative control shRNA (shCtrl) were co-electroporated in utero with pCAG-GFP, expressed in progenitors and neurons, at embryonic day (E) 14.5. (a,b) Three days later, cryosections were prepared and labeled for DAPI (blue) and GFP (green). The cerebral wall was subdivided into radial morphology zone (RMZ), multipolar morphology zone (MMZ) and VZ. Tables show the percentage of cells in the RMZ. n = 5 Control, 7 FGFR1(DN), 4 FGFR2(DN), 4 FGFR3(DN), 3 FGFR1, 3 FGFR2, 4 FGFR3, 6 shCtrl, 4 shFGFR1, 4 shFGFR2, 4 shFGFR3, 5 shFGFR1+2, 3 shFGFR1+3, 3 shFGFR2+3. [file elife-47673-fig1-data1.xls]

## Sheet: Sheet1
Figure 1: FGFRs regulate projection neuron migration in vivo
a,b shRNA against FGFR1, 2 or 3 and Dominant-negative (DN) but not wildtype FGFR1, 2 or 3 induce an accumulation of neurons at the MMZ. a pNeuroD-FGFR(DN) and pNeuroD-FGFR plasmids, expressed in neurons, and b shRNA against FGFR1, 2 or 3 or negative control shRNA (shCtrl) were co-electroporated in utero with pCAG-GFP, expressed in progenitors and neurons, at embryonic day (E) 14.5. a,b Three days…
	Figure 1a
		Control	FGFR1(DN)	FGFR2(DN)	FGFR3(DN)	FGFR1	FGFR2	FGFR3
	Average (%)	58.62	21.3189	9.07801	18.6201	61.9059	49.8464	59.6712
	St error	5.03478	2.90271	2.50631	4.48985	2.4051	1.87656	6.90006
	Figure 1b
		Control	shFGFR1	shFGFR2	shFGFR3	shFGFR1+2	shFGFR1+3	shFGFR2+3
	Average (%)	47.0257	12.0264	22.9731	42.4173	6.48922	10.9578	25.0323
	St error	4.856	3.27901	3.74969	1.90379	2.64627	0.946149	1.87946
