# Supplementary material for: N-cadherin-regulated FGFR ubiquitination and degradation control mammalian neocortical projection neuron migration
Source: eLife. 2019 Oct 2;8:e47673. doi: 10.7554/eLife.47673 (PMC6786859; doi:10.7554/eLife.47673)
Supplement: Figure 2—source data 1. — (a) Inhibition of FGFRs did not affect cell division (Ki67), apical (Sox2) or basal (Tbr2) progenitor cells, neuronal commitment (Satb2), or survival (cleaved Caspase-3). Expression of CherryFP (red) alone (control) or with FGFR1(DN) as indicated. After immunostaining for the indicated markers (green), the results were quantified by counting the number of labeled electroporated cells in a constant area of each section and averaged across sections from at least three different embryos for each antibody. (c, d) Inhibition of FGFR did not affect the number of neurites or the length to width morphology of multipolar cells. (c) Proportion of GFP+ cells with the indicated number of neurites within the MMZ. (d) Ratio of length/width of the GFP+ cells within the MMZ as an indicator of cell shape. (e) FGFR-inhibited neurons are disoriented. Golgi staining (green) of MMZ neurons (purple). The figure shows examples of multipolar neurons with their Golgi facing the CP (white arrows) or facing other directions (white arrowheads). The percentage of cells with Golgi facing the cortical plate was calculated (mean ± s.e.m.). (f) FGFR inhibition affects the multipolar to radial transition. Computer-based reconstruction of GFP+ neurons morphologies at the multipolar to radial transition zone (MRT) and the lower RMZ. The table shows the percentage of bipolar radially oriented neurons. (h, i) Inhibition of FGFR did not affect the length of the leading process and the length-to-width morphology of radially migrating cells. (h) Length of the leading process of GFP+ bipolar cells within the RMZ. (i) Ratio of length/width of the GFP+ cells within the RMZ as an indicator of cell shape. [file elife-47673-fig2-data1.xls]

## Sheet: Sheet1
Figure 2: Inhibiting FGFRs in post-mitotic neurons has no effect on proliferation and differentiation but regulates multipolar neuron orientation and morphology
In utero electroporation was performed at embryonic day E14.5 and analyzed 2 days later.
a Inhibition of FGFRs did not affect cell division (Ki67), apical (Sox2) or basal (Tbr2) progenitor cells, neuronal commitment (Satb2), or survival (cleaved Caspase-3). Expression of CherryFP (red) alone (control) or with FGFR1(DN) as indicated. After immunostaining for the indicated markers (green), the results were quantified by counting the number of labelled electroporated cells in a constant…
c, d Inhibition of FGFR did not affect the number of neurites or the length to width morphology of multipolar cells. c Proportion of GFP+ cells with the indicated number of neurites within the MMZ. d Ratio of length/width of the GFP+ cells within the MMZ as an indicator of cell shape.
e FGFR-inhibited neurons are disoriented. Golgi staining (green) of MMZ neurons (purple). The figure shows examples of multipolar neurons with their Golgi facing the CP (white arrows) or facing other directions (white arrowheads). The percentage of cells with Golgi facing the cortical plate was calculated (mean ± s.e.m.).
f FGFR inhibition affects the multipolar to radial transition. Computer-based reconstruction of GFP+ neurons morphologies at the multipolar to radial transition zone (MRT) and the lower RMZ. The table shows the percentage of bipolar radially oriented neurons.
h, i Inhibition of FGFR did not affect the length of the leading process and the length-to-width morphology of radially migrating cells. h Length of the leading process of GFP+ bipolar cells within the RMZ. i Ratio of length/width of the GFP+ cells within the RMZ as an indicator of cell shape.
	Figure 2a
		Ki67		Sox2		Tbr2		Satb2		Caspase-3
		Control	FGFR1(DN)	Control	FGFR1(DN)	Control	FGFR1(DN)	Control	FGFR1(DN)	Control	FGFR1(DN)
	Average	100	98.03	100	98.03	100	105.68	100	111.262	100	89.4
	St error	15.36	10.09	15.36	10.09	12.68	12.92	10.256	15.681	17.3	23.9
	Figure 2c
	# of neurites		0	1	2	3	4	5
	Average (%)	GFP	0	0	13.8889	55.5556	25	5.55556
		FGFR(DN)	0	0	14.6341	60.9756	19.5122	4.87805
	st error	GFP	0	0	2.365	5.943	3.885	1.153
		FGFR(DN)	0	0	3.129	7.359	3.911	1.965
	Figure 2d
		Control	FGFR1(DN)
	ratio	1.19135	1.16365
	st error	0.0232769	0.0223745
	Figure 2e
		Control	FGFR1(DN)
	Average (%)	71.75	51.65
	st error	1.95725	5.46268
	Figure 2f
		Control	FGFR1(DN)
	Average (%)	82.9268	15.1515
	st error	3.53	0.34
	Figure 2h
		Control	FGFR1(DN)
	Average (µm)	43.7111	46.2778
	st error	1.69344	2.23341
	Figure 2i
		Control	FGFR1(DN)
	Ratio	2.13662	2.22228
	st error	0.0571962	0.0613768
