# Supplementary material for: N-cadherin-regulated FGFR ubiquitination and degradation control mammalian neocortical projection neuron migration
Source: eLife. 2019 Oct 2;8:e47673. doi: 10.7554/eLife.47673 (PMC6786859; doi:10.7554/eLife.47673)
Supplement: Figure 3—source data 1. — E14.5 embryos were electroporated in utero with pCAG-GFP, pNeuroD vector or pNeuroD-Rap1GAP (RG), and pNeuroD-FGFR1, 2 or three as shown. Cryosections were prepared 3 days later and labeled for DAPI (blue) and GFP (green). The cerebral wall was subdivided into radial morphology zone (RMZ), multipolar morphology zone (MMZ) and VZ. Table shows the percentage of cells in the RMZ. (n = 4 Control, 4 Rap1GAP (RG), 7 RG+FGFR1, 7 RG+FGFR2, 4 RG+FGFR3). [file elife-47673-fig3-data1.xls]

## Sheet: Sheet1
a FGFR1, 2 and 3 partially rescue the neuronal migration phenotype induced by Rap1 inhibition. E14.5 embryos were electroporated in utero with pCAG-GFP, pNeuroD vector or pNeuroD-Rap1GAP (RG), and pNeuroD-FGFR1, 2 or 3 as shown. Cryosections were prepared 3 days later and labelled for DAPI (blue) and GFP (green). The cerebral wall was subdivided into radial morphology zone (RMZ), multipolar morph…
	Figure 3a
		Control	RapGAP (RG)	RG+FGFR1	RG+FGFR2	RG+FGFR3
	Average (%)	59.8567	6.43129	29.1963	40.628	31.4064
	st error	4.36194	2.27804	4.62655	3.74944	9.25479
