# Supplementary material for: N-cadherin-regulated FGFR ubiquitination and degradation control mammalian neocortical projection neuron migration
Source: eLife. 2019 Oct 2;8:e47673. doi: 10.7554/eLife.47673 (PMC6786859; doi:10.7554/eLife.47673)
Supplement: Figure 4—source data 1. — E14.5 embryos were electroporated in utero with pCAG-GFP, pNeuroD-Rap1GAP (RG), and pNeuroD vector, NCad, NCadW161A or ECad. Cryosections were prepared 3 days later and labeled for DAPI (blue) or GFP (green). Table shows the percentage of cells in the RMZ. (n = 5 Rap1GAP (RG), 5 RG+NCad, 6 RG+NCadW161A, 5 RG+ECad). [file elife-47673-fig4-data1.xls]

## Sheet: Sheet1
Figure 4: NCad homophilic binding mutant NCadW161A but not ECad rescues multipolar migration of Rap1-inhibited neurons.
E14.5 embryos were electroporated in utero with pCAG-GFP, pNeuroD-Rap1GAP (RG), and pNeuroD vector, NCad, NCadW161A or ECad. Cryosections were prepared 3 days later and labelled for DAPI (blue) or GFP (green). Table shows the percentage of cells in the RMZ. (n = 5 Rap1GAP (RG), 5 RG+NCad, 6 RG+NCadW161A, 5 RG+ECad).
	Figure 4
		RapGAP (RG)	RG+NCad	RG+NCadW161A	RG+ECad
	Average (%)	5.70528	41.733	48.4883	7.97574
	st error	1.81125	5.62827	8.5393	1.11915
