# Supplementary material for: N-cadherin-regulated FGFR ubiquitination and degradation control mammalian neocortical projection neuron migration
Source: eLife. 2019 Oct 2;8:e47673. doi: 10.7554/eLife.47673 (PMC6786859; doi:10.7554/eLife.47673)
Supplement: Figure 5—source data 1. — E14.5 embryos were electroporated in utero with pCAG-GFP and pNeuroD-Rap1GAP (RG), pNeuroD-NCadDEC4-HA or vector. Cryosections were prepared three days later and labeled for DAPI (blue) and GFP (green). The table shows the percentage of cells in the RMZ. n = 4 control, 4 Rap1GAP (RG), 6 RG+ NCadDEC4. [file elife-47673-fig5-data1.xls]

## Sheet: Sheet1
d NCad EC4 is required for the multipolar migration. E14.5 embryos were electroporated in utero with pCAG-GFP and pNeuroD-Rap1GAP (RG), pNeuroD-NCadDEC4-HA or vector. Cryosections were prepared three days later and labelled for DAPI (blue) and GFP (green). The table shows the percentage of cells in the RMZ. n = 4 control, 4 Rap1GAP (RG), 6 RG+ NCadDEC4.
	Figure 5d
		Control	RapGAP (RG)	RG+NCadDEC4
	Average (%)	52.4469	4.05975	3.16609
	st error	4.7353	0.977829	0.700223
