# Supplementary material for: N-cadherin-regulated FGFR ubiquitination and degradation control mammalian neocortical projection neuron migration
Source: eLife. 2019 Oct 2;8:e47673. doi: 10.7554/eLife.47673 (PMC6786859; doi:10.7554/eLife.47673)
Supplement: Figure 6—source data 1. — In utero electroporation at embryonic day E14.5 and analysis 3 days later. pNeuroD plasmids coding for the indicated proteins and pCAG-GFP were co-electroporated. The table shows the percentage of cells in the RMZ. n = 5 Rap1GAP (RG), 5 RG+NCad, 5 RG+ECad, 8 RG+NECad, 5 RG+ENCad, 5 RG+NENCad, 5 RG+ENNCad. [file elife-47673-fig6-data1.xls]

## Sheet: Sheet1
b NCad EC1-2 promote neuronal migration in vivo. In utero electroporation at embryonic day E14.5 and analysis 3 days later. pNeuroD plasmids coding for the indicated proteins and pCAG-GFP were co-electroporated. The table shows the percentage of cells in the RMZ. n = 5 Rap1GAP (RG), 5 RG+NCad, 5 RG+ECad, 8 RG+NECad, 5 RG+ENCad, 5 RG+NENCad, 5 RG+ENNCad.
	Figure 6b
		RapGAP (RG)	RG+Ncad	RG+Ecad	RG+NECad	RG+ENCad	RG+NENCad	RG+ENNCad
	Average (%)	7.5029	41.733	7.97574	37.779	14.8019	33.07	9.68594
	st error	1.82604	5.62827	1.11915	6.39716	4.80815	4.56826	1.71762
