# Supplementary material for: N-cadherin-regulated FGFR ubiquitination and degradation control mammalian neocortical projection neuron migration
Source: eLife. 2019 Oct 2;8:e47673. doi: 10.7554/eLife.47673 (PMC6786859; doi:10.7554/eLife.47673)
Supplement: Figure 7—source data 1. — (c) Inhibition of K27- and K29-linked polyubiquitination increases FGFR1 protein level. Ubiquitin-GFP mutants in which one lysine is mutated into arginine were used to identify lysine residues required for polyubiquitin chain formation. Co-translational cleavage detaches the GFP and frees the terminal glycine of ubiquitin for subsequent conjugation (Boname et al., 2010). The cleaved GFP was used to quantify ubiquitin mutant expression. The table shows the relative FGFR1-Myc band intensity when expressed in the presence or absence of NCad-HA and in the presence of an ubiquitin mutant as indicated (mean ± s.e.m.). n = 4 UbiK6R, 3 UbiK11R, 3 UbiK27R, 3 UbiK29R, 4 UbiK33R, 4 UbiK48R, 3 UbiK63R, 8 UbiWT. (e) Inhibition of K27-linked polyubiquitin chain formation in vivo rescues the migration defect of Rap1GAP-expressing cells. In utero electroporation at embryonic day E14.5 and analysis 3 days later. Plasmids coding for the indicated proteins and GFP were co-electroporated. The table shows the percentage of cells in the RMZ (mean ± s.e.m.). n = 4 Rap1GAP (RG), 8 RG+UbiK27R, 6 RG+UbiWT. [file elife-47673-fig7-data1.xls]

## Sheet: Sheet1
c Inhibition of K27- and K29-linked polyubiquitination increases FGFR1 protein level. Ubiquitin-GFP mutants in which one lysine is mutated into arginine were used to identify lysine residues required for polyubiquitin chain formation. Co-translational cleavage detaches the GFP and frees the terminal glycine of ubiquitin for subsequent conjugation (Boname et al., 2010). The cleaved GFP was used to…
e Inhibition of K27-linked polyubiquitin chain formation in vivo rescues the migration defect of Rap1GAP-expressing cells. In utero electroporation at embryonic day E14.5 and analysis 3 days later. Plasmids coding for the indicated proteins and GFP were co-electroporated. The table shows the percentage of cells in the RMZ (mean ± s.e.m.). n = 4 Rap1GAP (RG), 8 RG+UbiK27R, 6 RG+UbiWT.
	Figure 7c
		+Ub-K6R	+Ub-K6R	+Ub-K11R	+Ub-K11R	+Ub-K27R	+Ub-K27R	+Ub-K29R	+Ub-K29R	+Ub-K33R	+Ub-K33R	+Ub-K48R	+Ub-K48R	+Ub-K63R	+Ub-K63R	+Ub-WT	+Ub-WT
			+Ncad		+Ncad		+Ncad		+Ncad		+Ncad		+Ncad		+Ncad		+Ncad
	Relative intensity	0.225049	0.647395	0.262053	0.881557	0.862295	0.873262	0.870333	0.903052	0.412242	0.798307	0.50975	0.937004	0.385719	1.16211	0.351534	1
	st error	0.093695	0.128728	0.15219	0.198973	0.17	0.19	0.15	0.16	0.161776	0.18	0.171251	0.149394	0.143124	0.10405	0.08901	0.145378
	Figure 7e
		RapGAP(RG)	RG+UbiK27R	RG+UbiWT
	Average (%)	8.76289	28.0458	8.55622
	st error	3.02848	3.41973	2.49323
