# Supplementary material for: N-cadherin-regulated FGFR ubiquitination and degradation control mammalian neocortical projection neuron migration
Source: eLife. 2019 Oct 2;8:e47673. doi: 10.7554/eLife.47673 (PMC6786859; doi:10.7554/eLife.47673)
Supplement: Figure 9—source data 1. — E14.5 embryos were electroporated in utero with pCAG-GFP and dominant-negative (DN) or wildtype pNeuroD-Erk1/2. Cryosections were prepared three days later. The table shows the percentage of cells in the RMZ. n = 4 Control, 6 Erk1(DN), 5 Erk2(DN), 6 Erk1, 4 Erk2. [file elife-47673-fig9-data1.xls]

## Sheet: Sheet1
a Erk1/2 inhibition impairs multipolar migration. E14.5 embryos were electroporated in utero with pCAG-GFP and dominant-negative (DN) or wildtype pNeuroD-Erk1/2. Cryosections were prepared three days later. The table shows the percentage of cells in the RMZ. n = 4 Control, 6 Erk1(DN), 5 Erk2(DN), 6 Erk1, 4 Erk2.
	Figure 9a
		Control	Erk1(DN)	Erk2(DN)	Erk1(WT)	Erk2(WT)
	Average (%)	55.3047	30.4462	29.8371	56.883	47.3555
	st error	5.77245	6.56402	5.16196	5.53589	10.1079
